# Supplementary material for: A highly active and durable NiMoCuCo catalyst with moderated hydroxide adsorption energy for efficient hydrogen evolution reaction
Source: Royal Society of Chemistry journal article supplement (doi:10.1039/d4qi01947d), 2024-01-01
Supplement: d4qi01947d1.pdf [file d4qi01947d1.pdf]

Supporting Information

## Highly active and durable NiMoCuCo catalyst with moderated hydroxide adsorption energy for efficient hydrogen evolution reaction in alkaline media

*Hyeonggeun Choi<sup>a,1</sup>, Seunghwan Jo<sup>a,1</sup>, Ki Hoon Shin<sup>a</sup>, HeeYoung Lim<sup>b</sup>, Liting Zhang<sup>a</sup>, Keon Beom Lee<sup>a</sup>, Young-Woo Lee<sup>b,c,\*</sup>, Jung Inn Sohn<sup>a,\*</sup>*

<sup>a</sup> Division of Physics and Semiconductor Science, Dongguk University-Seoul, Seoul 04620 Republic of Korea

<sup>b</sup> Department of Energy Engineering, Soonchunhyang University, Asan 31538, Republic of Korea

<sup>c</sup> Advanced Energy Research Center, Soonchunhyang University, Asan 31538, Republic of Korea

<sup>1</sup> These authors contributed equally to this work.

\*Corresponding author.

*E-mail address:* ywlee@sch.ac.kr (Y.-W. Lee), junginn.sohn@dongguk.edu (J.I. Sohn).

**Keywords:** ternary transition metal, water electrolysis, hydrogen evolution reaction, water dissociation, metal dissolution

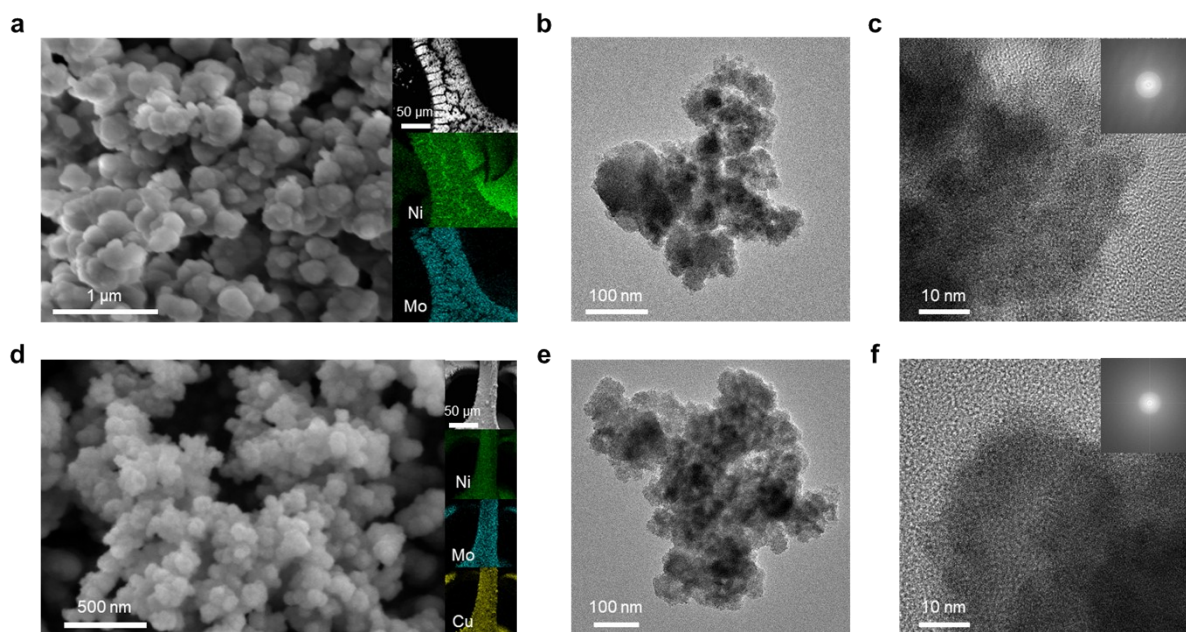

**Fig. S1** (a) FE-SEM (left) and EDS (right) images of NiMo. (b) FE-TEM and (c) high-resolution TEM images of NiMo. The inset shows a fast Fourier transform image. (d) FE-SEM (left) and EDS (right) images of NiMoCu. (e) FE-TEM and (f) high-resolution TEM images of NiMoCu. The inset shows a fast Fourier transform image.

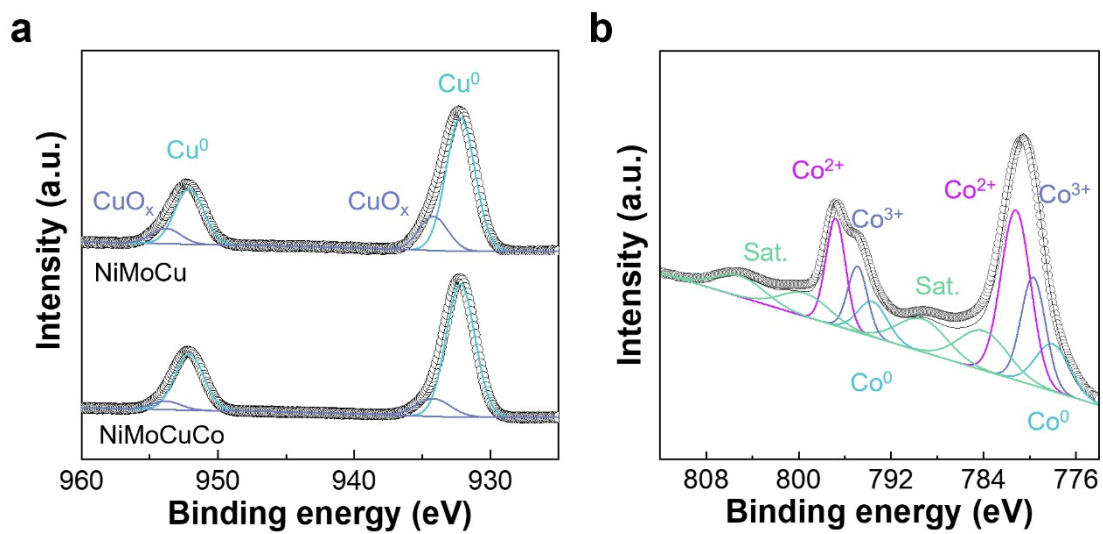

**Fig. S2** XPS spectra of the prepared electrocatalysts in (a) Cu 2*p* and (b) Co 2*p* regions.

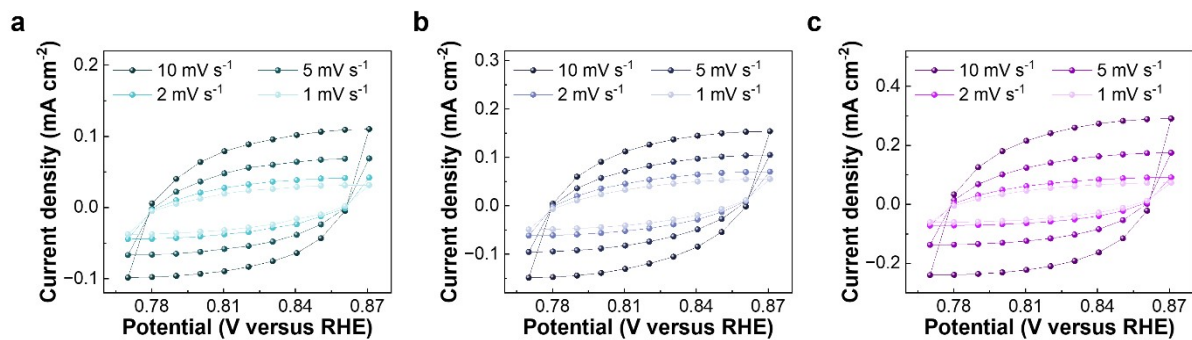

**Fig. S3** Cyclic voltammety curves of (a) NiMo, (b) NiMoCu, and (c) NiMoCuCo.

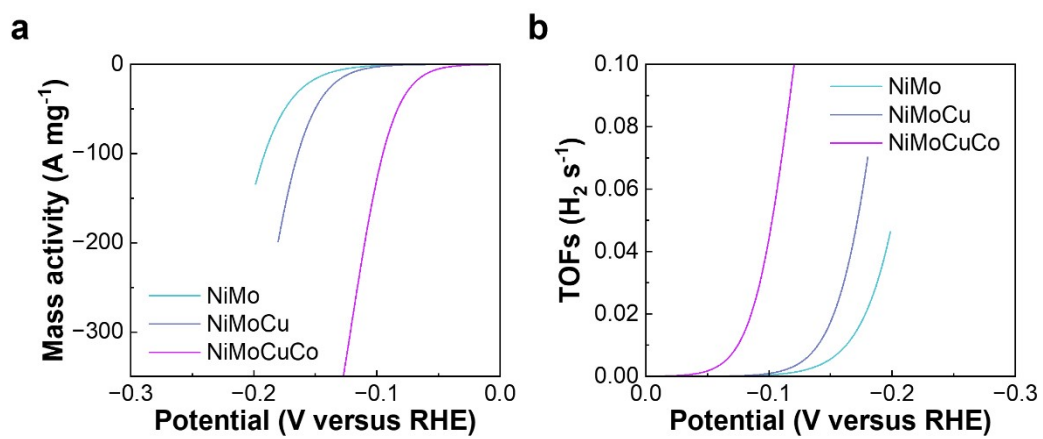

**Fig. S4** Polarization curves normalized by (a) loading mass and (b) turnover frequency.

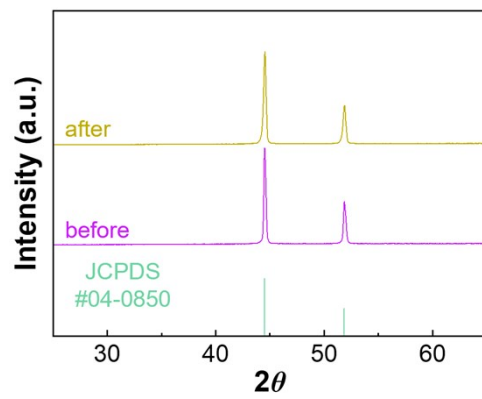

**Fig. S5** XRD patterns of NiMoCuCo before and after the long-term stability test.

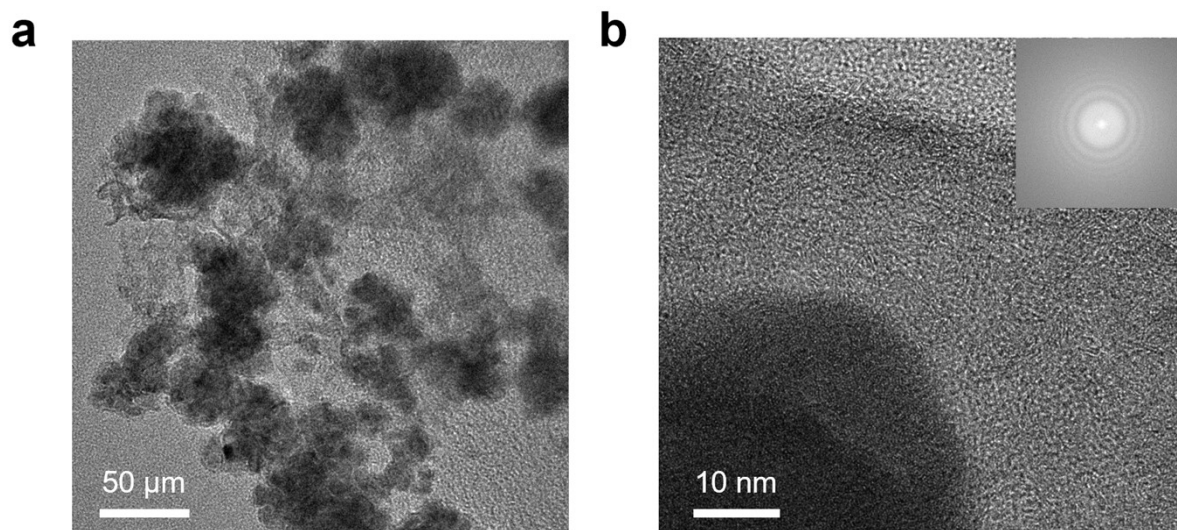

**Fig. S6** (a) FE-TEM and (b) high-resolution TEM images of NiMoCuCo after the long-term stability test. The inset shows a fast Fourier transform image.

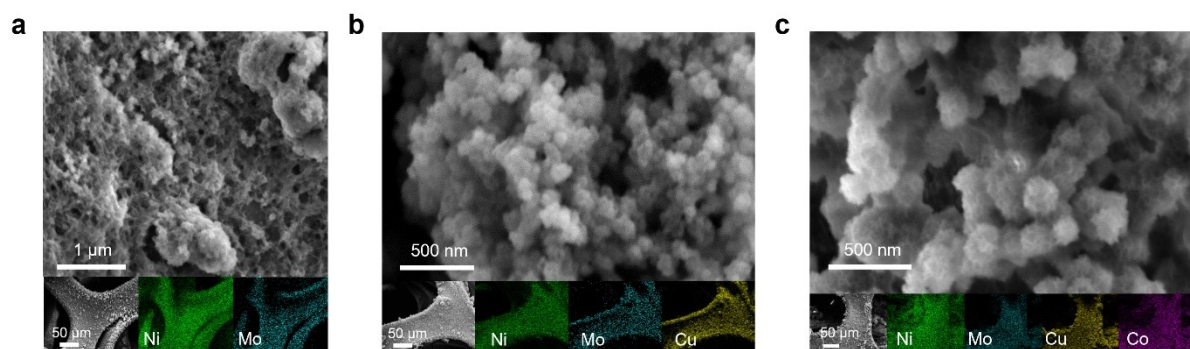

**Fig. S7** FE-SEM (top) and EDS (bottom) images of (a) NiMo, (b) NiMoCu, and (c) NiMoCuCo.



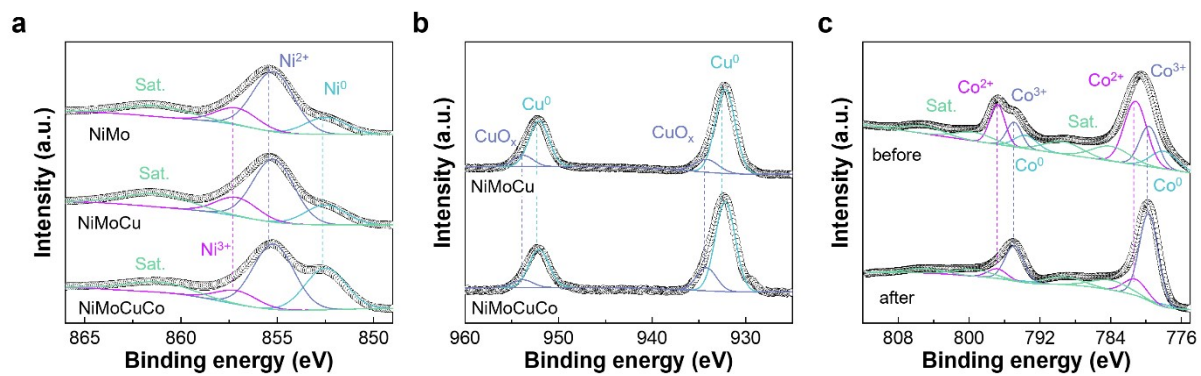

**Fig. S8** XPS spectra of the long-term stability tested electrocatalysts in (a) Ni 2*p*, (b) Cu 2*p*, and (c) Co 2*p* regions.

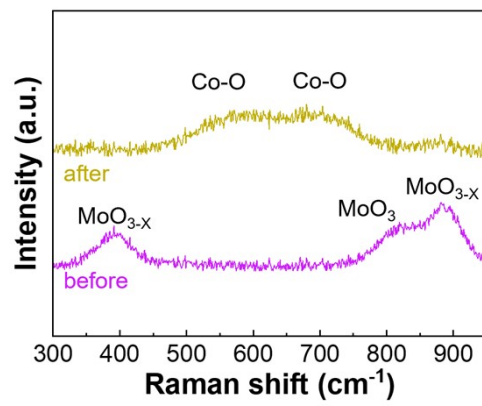

**Fig. S9** Raman spectra of NiMoCuCo before and after the long-term stability test.

**Table S1** Comparative analysis of the recently studied alkaline HER electrocatalysts with respect to the catalytic performance at a current density of 10 mA cm<sup>-2</sup>.

| Catalysts                                               | Electrode     | Overpotential (mV) | Tafel slope (mV dec <sup>-1</sup> ) | Stability Condition       | Stability time (h) | Ref.      |
|---------------------------------------------------------|---------------|--------------------|-------------------------------------|---------------------------|--------------------|-----------|
| NiMoCuCo                                                | Ni foam       | 53                 | 34.2                                | 100 mA cm <sup>-2</sup>   | 100                | This work |
| VNMS                                                    | Graphite rod  | 122                | 57                                  | -0.17 V versus RHE        | 10                 | 1         |
| Pt/NiRu-LDH                                             | Ni foam       | 38                 | 39                                  | -0.075 V versus RHE       | 30                 | 2         |
| Se-MoS <sub>2</sub> /CoSe <sub>2</sub>                  | Ni foam       | 30                 | 44                                  | 100 mA cm <sup>-2</sup>   | 40                 | 3         |
| RhSe <sub>2</sub>                                       | Glassy carbon | 81.6               | 96                                  | 10,000 cycle              | -                  | 4         |
| O-NiCu                                                  | Iron foam     | 23                 | 34.1                                | 10 mA cm <sup>-2</sup>    | 100                | 5         |
| FeCoNiCuPd                                              | Carbon cloth  | 29.7               | 47.2                                | 100 mA cm <sup>-2</sup>   | 36                 | 6         |
| Mo-NiS/Ni <sub>3</sub> S <sub>2</sub> -0.08S            | Ni foam       | 73                 | 115.7                               | 1,000 cycle               | -                  | 7         |
| MoS <sub>2</sub> -MoP/NC                                | Carbon cloth  | 35                 | 30                                  | 10,000 cycle              | -                  | 8         |
| 6B-Fe <sub>7</sub> S <sub>8</sub> /FeS <sub>2</sub> /CC | Carbon cloth  | 113                | 57.4                                | 1,000 cycle               | -                  | 9         |
| NiP <sub>2</sub> -650 (c/m)                             | Carbon cloth  | 134                | 67                                  | 50 mA cm <sup>-2</sup>    | 14                 | 10        |
| CeO <sub>2</sub> /CoS <sub>2</sub> /Ti                  | Ti plate      | 36                 | 38                                  | 40 mA cm <sup>-2</sup>    | 1,000              | 11        |
| 1%Pt-NiCoP@Mxene                                        | Carbon cloth  | 26.5               | 38.6                                | 500 mA cm <sup>-2</sup>   | 3,000              | 12        |
| RRu-Ru <sub>2</sub> P                                   | Glassy carbon | 95                 | 31.99                               | 1,000 mA cm <sup>-2</sup> | 1,000              | 13        |
| NiVB@rGO                                                | Glassy        | 196                | 88                                  | Not                       | 12                 | 14        |

|                                      |                |     |      |                          |    |    |
|--------------------------------------|----------------|-----|------|--------------------------|----|----|
|                                      | carbon         |     |      | mentioned                |    |    |
| Ni <sub>2</sub> Cr <sub>1</sub> -LDH | Nickel<br>foam | 138 | 61.5 | -0.07 V<br>versus<br>RHE | 30 | 15 |

## Reference

- [1] S. Bolar, S. Shit, N.C. Murmu, P. Samanta, T. Kuila, Activation strategy of MoS<sub>2</sub> as HER electrocatalyst through doping-induced lattice strain, band gap engineering, and active crystal plane design, *ACS Appl. Mater. Interfaces*, 2021, **13**, 1, 765-780
- [2] D. Li, X. Chen, Y. Lv, G. Zhang, Y. Huang, W. Liu, Y. Li, R. Chen, C. Nuckolls, H. Ni, An effective hybrid electrocatalyst for the alkaline HER: Highly dispersed Pt sites immobilized by a functionalized NiRu-hydroxide, *Appl. Catal. B*, 2020, **269**, 118824
- [3] L. Liao, J. Sun, D. Li, F. Yu, Y. Zhu, Y. Yang, J. Wang, W. Zhou, D. Tang, S. Chen, H. Zhou, Highly robust non-noble alkaline hydrogen-evolving electrocatalyst from Se-doped molybdenum disulfide particles on interwoven CoSe<sub>2</sub> nanowire arrays, *Small*, 2020, **16**, 1906629
- [4] W. Zhong, B. Xiao, Z. Lin, Z. Wang, L. Huang, S. Shen, Q. Zhang, L. Gu, RhSe<sub>2</sub>: A superior 3D electrocatalyst with multiple active facets for hydrogen evolution reaction in both acid and alkaline solutions, *Adv. Mater.*, 2021, **33**, 2007894
- [5] J. Wang, S. Xin, Y. Xiao, Z. Zhang, Z. Li, W. Zhang, C. Li, R. Bao, J. Peng, J. Yi, S. Chou, Manipulating the water dissociation electrocatalytic sites of bimetallic nickel-based alloys for highly efficient alkaline hydrogen evolution, *Angew. Chem. Int. Ed.*, 2022, **61**, e202202518
- [6] S. Wang, B. Xu, W. Huo, H. Feng, X. Zhou, F. Fang, Z. Xie, J.K. Shang, J. Jiang, Efficient FeCoNiCuPd thin-film electrocatalyst for alkaline oxygen and hydrogen evolution reactions, *Appl. Catal. B*, 2022, **313**, 121472

- [7] K. Zhang, Y. Duan, N. Graham, W. Yu, Unveiling the synergy of polymorph heterointerface and sulfur vacancy in NiS/Ni<sub>3</sub>S<sub>2</sub> electrocatalyst to promote alkaline hydrogen evolution reaction, *Appl. Catal. B*, 2023, **323**, 122144
- [8] X. Huang, H. Xu, D. Cao, D. Cheng, Interface construction of P-substituted MoS<sub>2</sub> as efficient and robust electrocatalyst for alkaline hydrogen evolution reaction, *Nano Energy*, 2020, **78**, 105253
- [9] J. Wu, Q. Zhang, K. Shen, R. Zhao, W. Zhong, C. Yang, H. Xiang, X. Li, N. Yang, Modulating interband energy separation of boron-doped Fe<sub>7</sub>S<sub>8</sub>/FeS<sub>2</sub> electrocatalysts to boost alkaline hydrogen evolution reaction, *Adv. Funct. Mater.*, 2022, **32**, 2107802
- [10] Q. Fu, X. Wang, J. Han, J. Zhong, T. Zhang, T. Yao, C. Xu, T. Gao, S. Xi, C. Liang, L. Xu, P. Xu, B. Song, Phase-junction electrocatalysts towards enhanced hydrogen evolution reaction in alkaline media, *Angew. Chem. Int. Ed.*, 2021, **133**, 263-271
- [11] J. Li, Z. Xia, Q. Xue, M. Zhang, S. Zhang, H. Xiao, Y. Ma, Y. Qu, Insights into the interfacial Lewis acid-base pairs in CeO<sub>2</sub>-loaded CoS<sub>2</sub> electrocatalysts for alkaline hydrogen evolution, *Small*, 2021, **17**, 2103018
- [12] H.-J. Niu, C. Huang, T. Sun, Z. Fang, X. Ke, R. Zhang, N. Ran, J. Wu, J. Liu, W. Zhou, Enhancing Ni/Co activity by neighboring Pt atoms in NiCoP/MXene electrocatalyst for alkaline hydrogen evolution, *Angew. Chem. Int. Ed.*, 2024, **63**, e202401819
- [13] Q. Yu, W. Yu, Y. Wang, J. He, Y. Chen, H. Yuan, R. Liu, J. Wang, S. Liu, J. Yu, H. Liu, W. Zhou, Hydroxyapatite-derived heterogeneous Ru-Ru<sub>2</sub>P electrocatalyst and environmentally-friendly membrane electrode toward efficient alkaline electrolyzer, *Small*, 2023, **19**, 2208045

[14] M. Arif, G. Yasin, M. Shakeel, M.A. Mushtaq, W. Ye, X. Fang, S. Ji, D. Yan, Highly active sites of NiVB nanoparticles dispersed onto graphene nanosheets towards efficient and pH-universal overall water splitting, *J. Energy Chem.*, 2021, **58**, 237-246

[15] W. Ye, X. Fang, X. Chen, D. Yan, A three-dimensional nickel-chromium layered double hydroxide micro/nanosheet array as an efficient and stable bifunctional electrocatalyst for overall water splitting, *Nanoscale*, 2018, **10**, 19484
